# Supplementary material for: Case Report: Genetic Alterations Associated with the Progression of Carotid Paraganglioma
Source: MDPI journal article supplement (doi:10.3390/cimb43030159), 2021-12-17
Supplement: s1 [file s1]

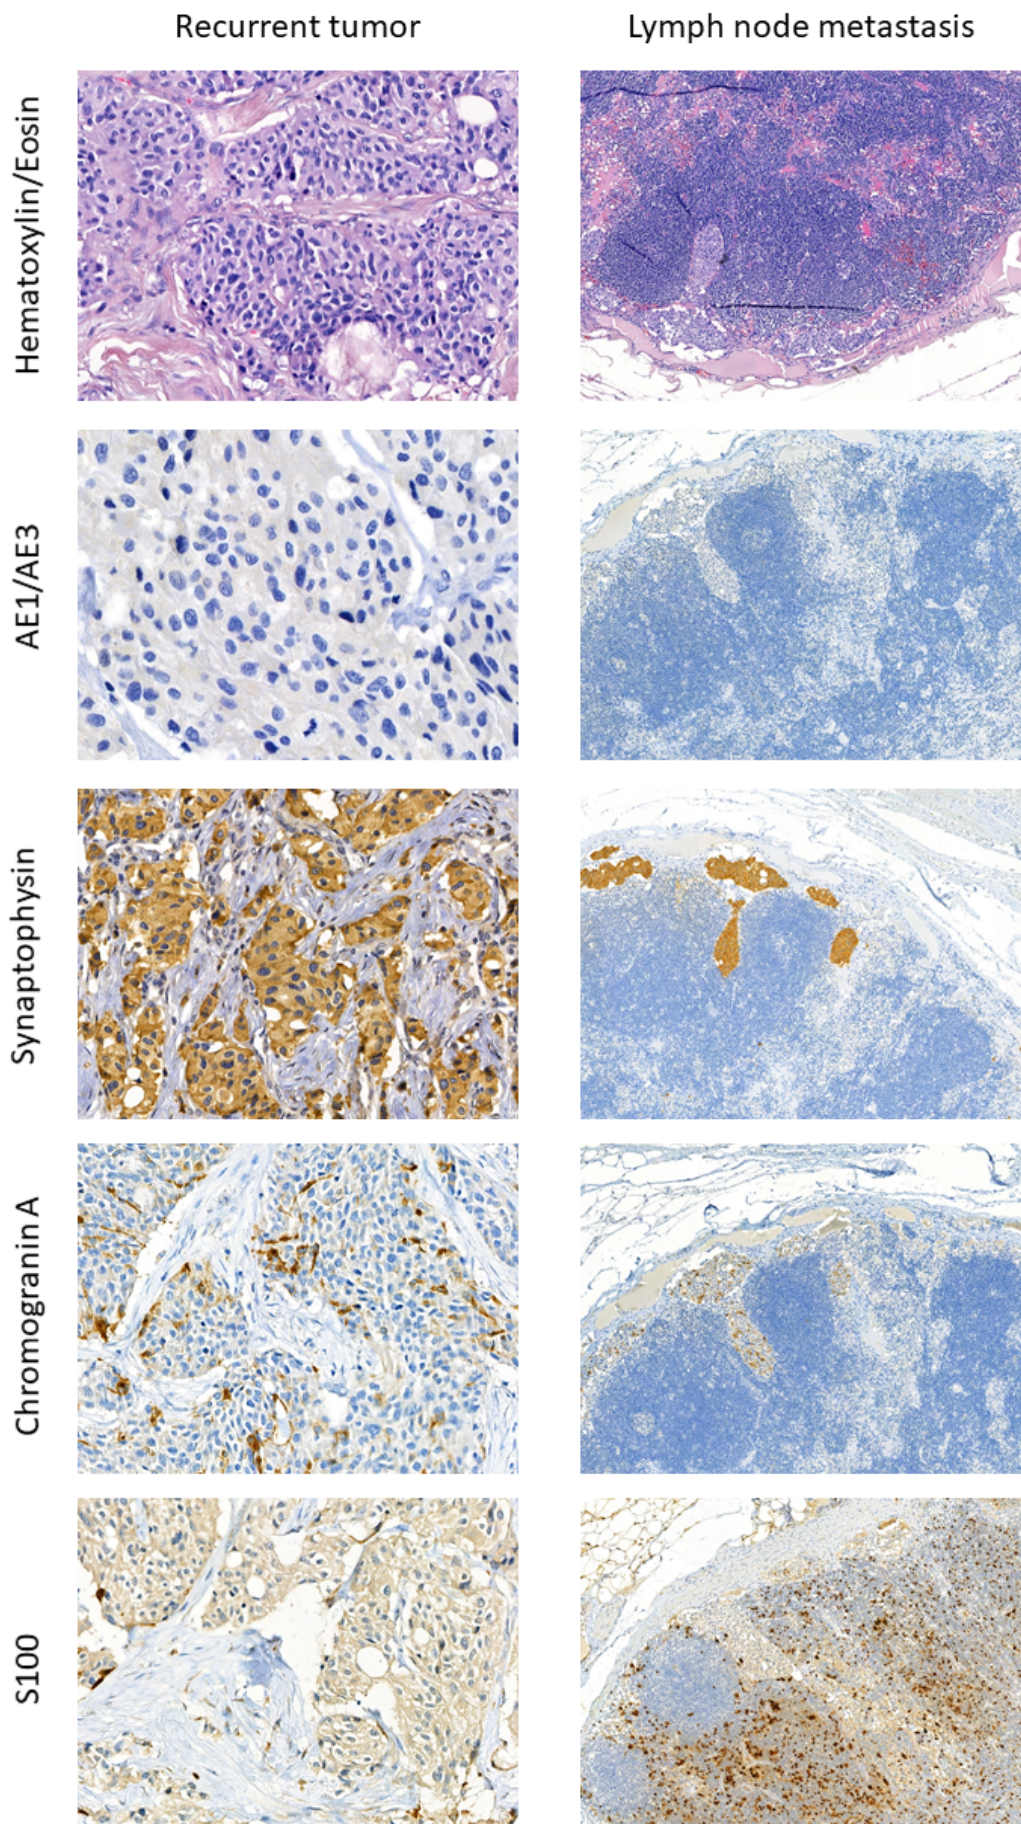

**Figure S1.** Immunohistochemistry images for Hematoxylin/Eosin, AE1/AE3, Synaptophysin, Chromogranin A, and S100 protein in recurrent tumor and metastasis.



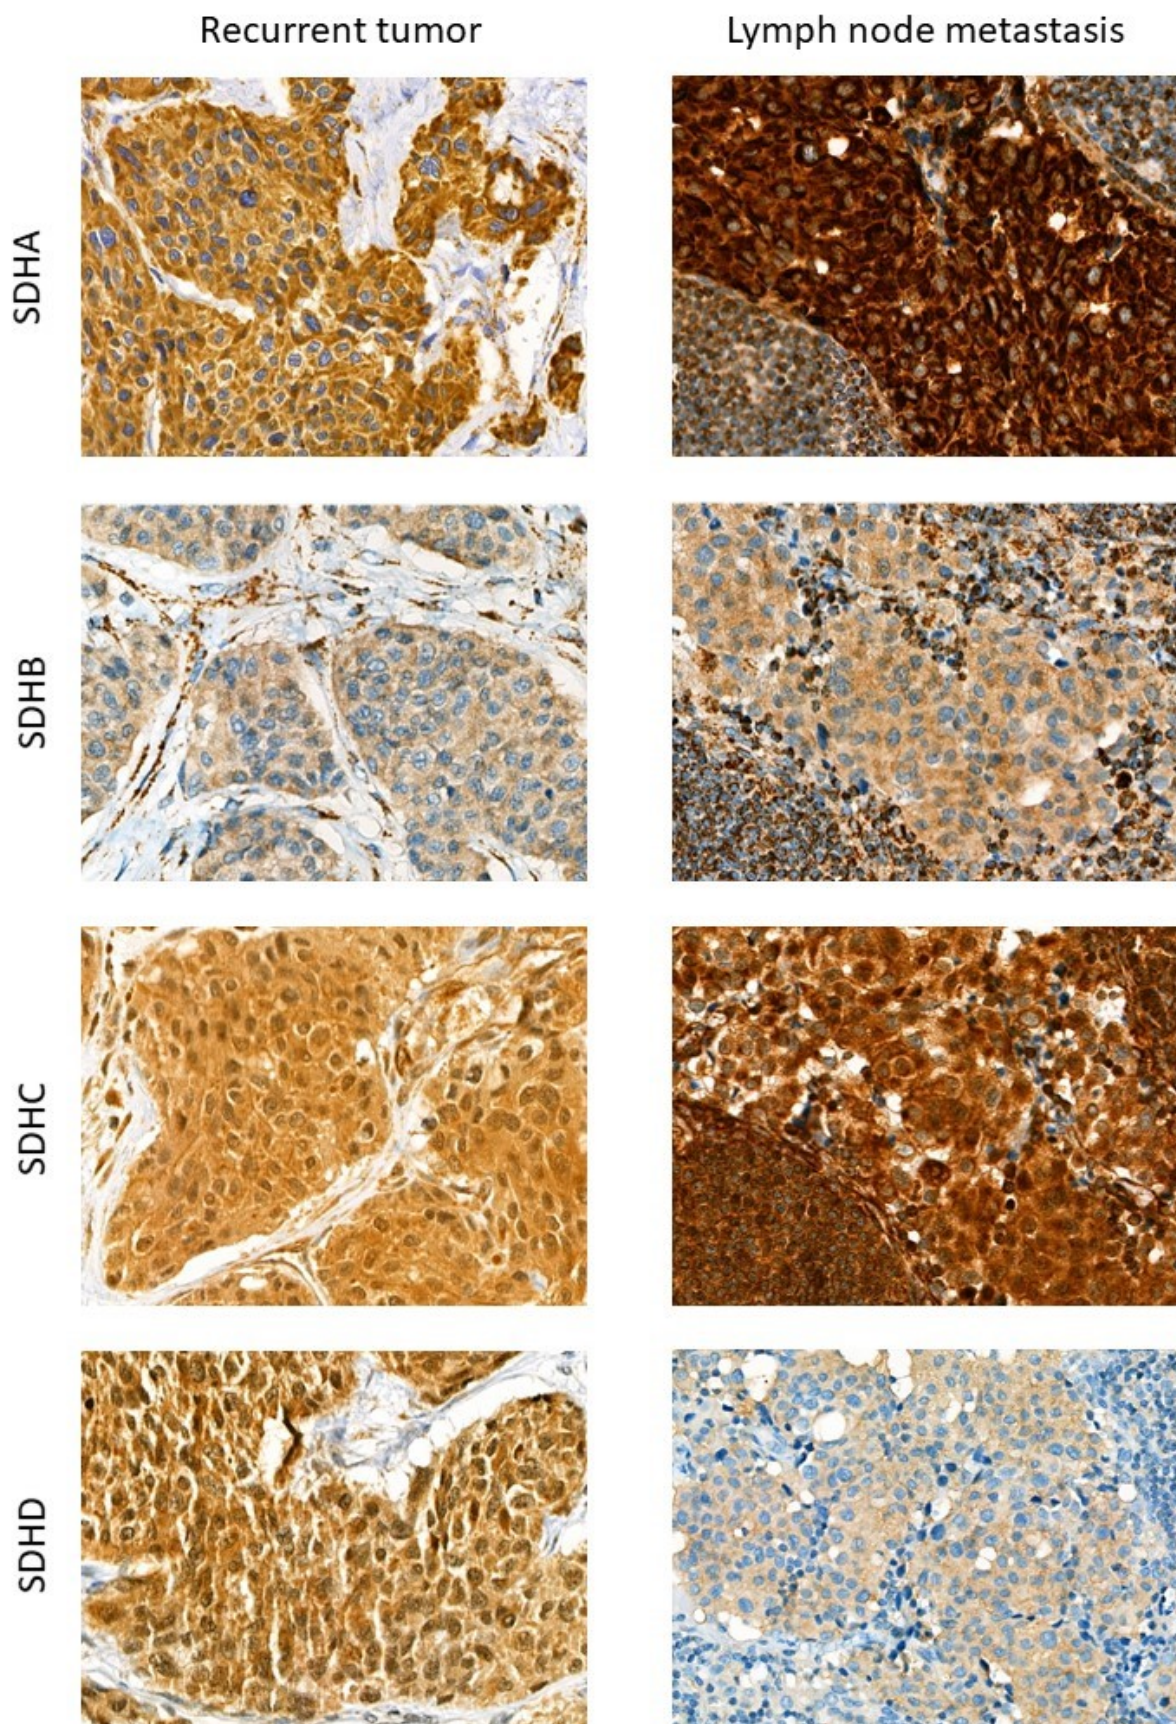

**Figure S2.** Immunohistochemistry images for subunits of the SDH complex in recurrent tumor and metastasis.



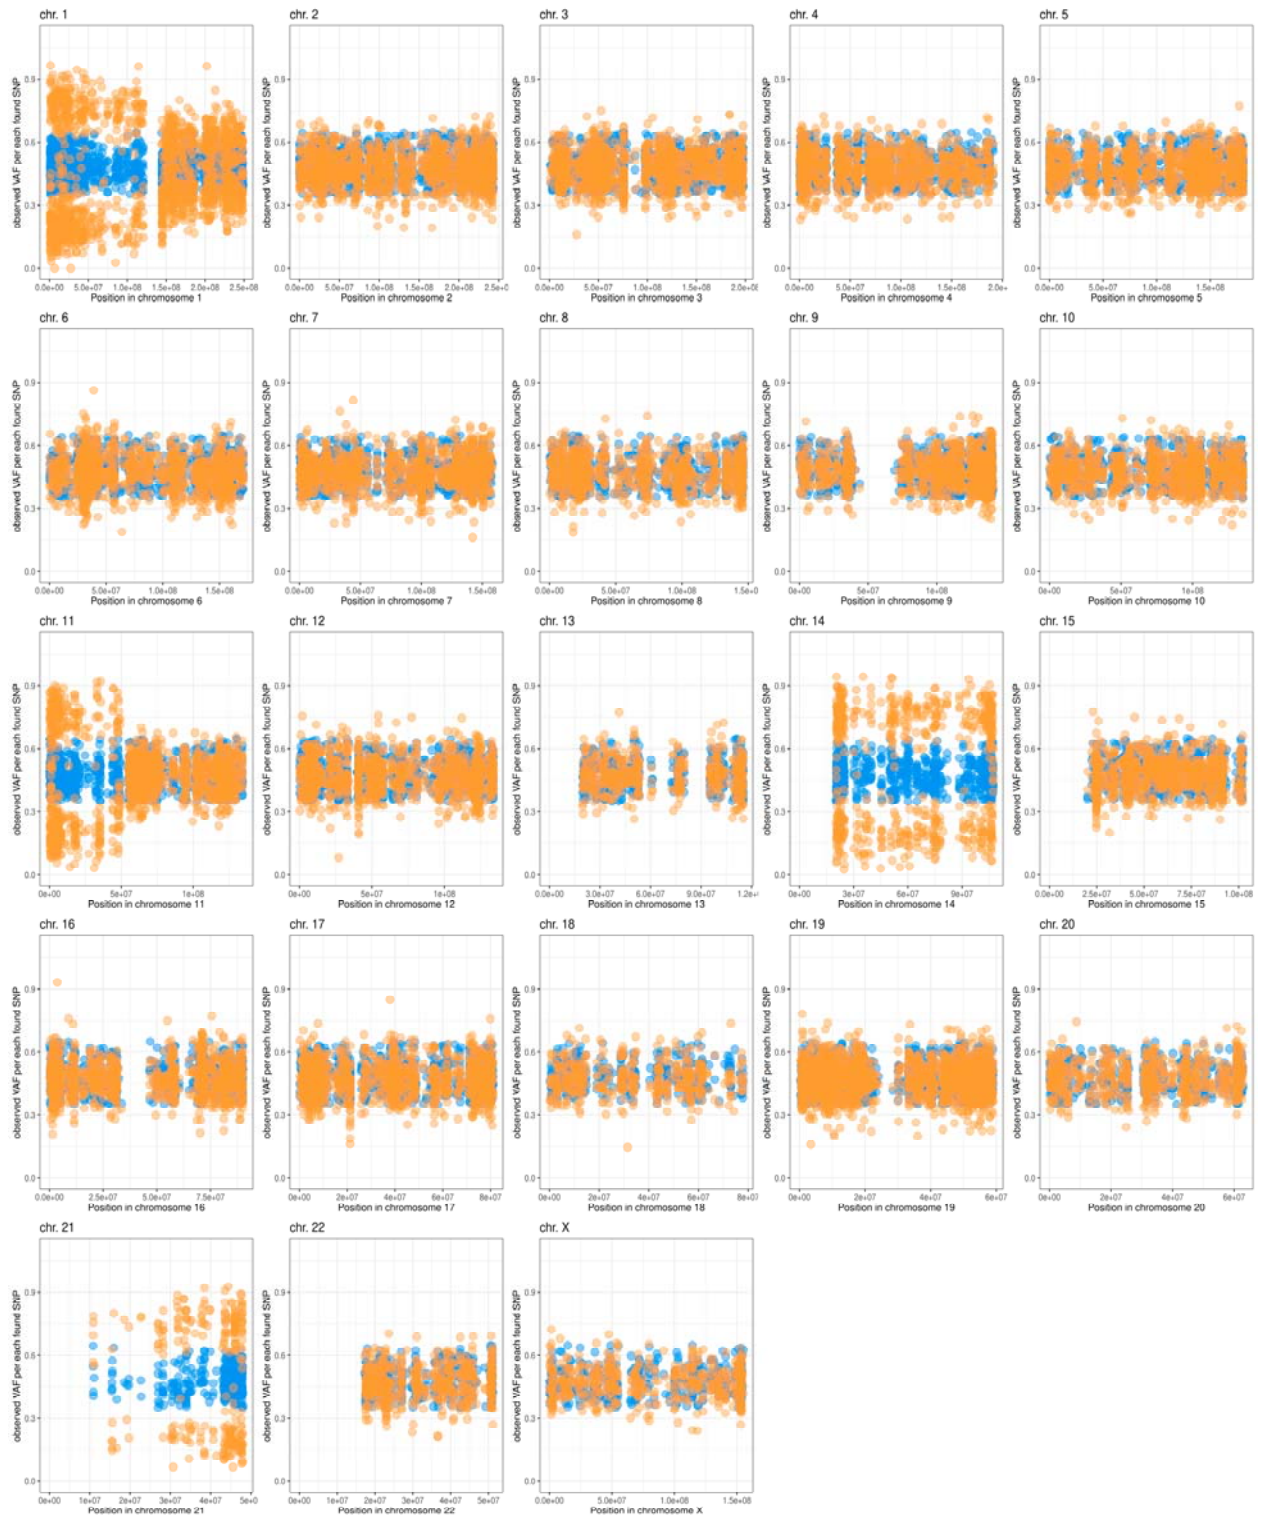

**Figure S3.** Variant allele frequency (VAF) across all chromosomes of recurrent tumor (orange dots) and lymph node (blue dots).

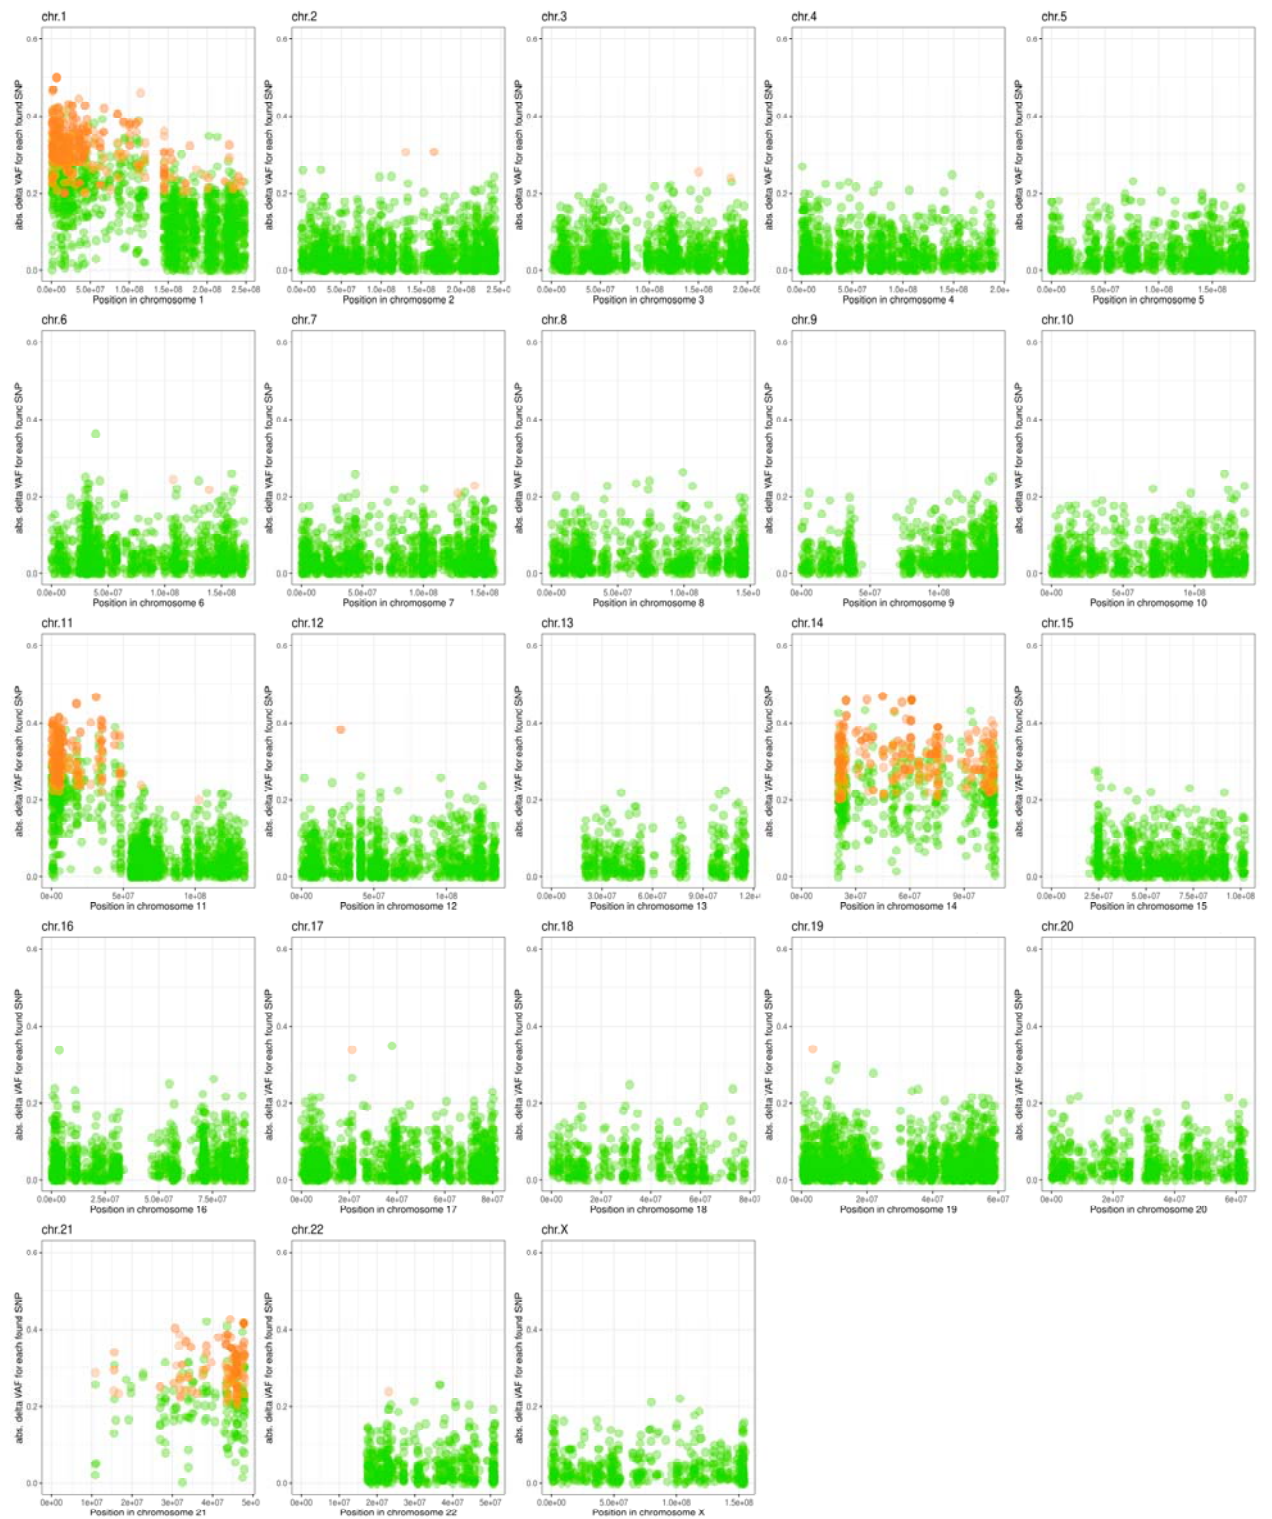

**Figure S4.** Delta-Variant allele frequency (VAF) across all chromosomes. Green dots indicate VAF with a difference between recurrent tumor and lymph node less than 0.2, orange dots marked those with more than 0.2.

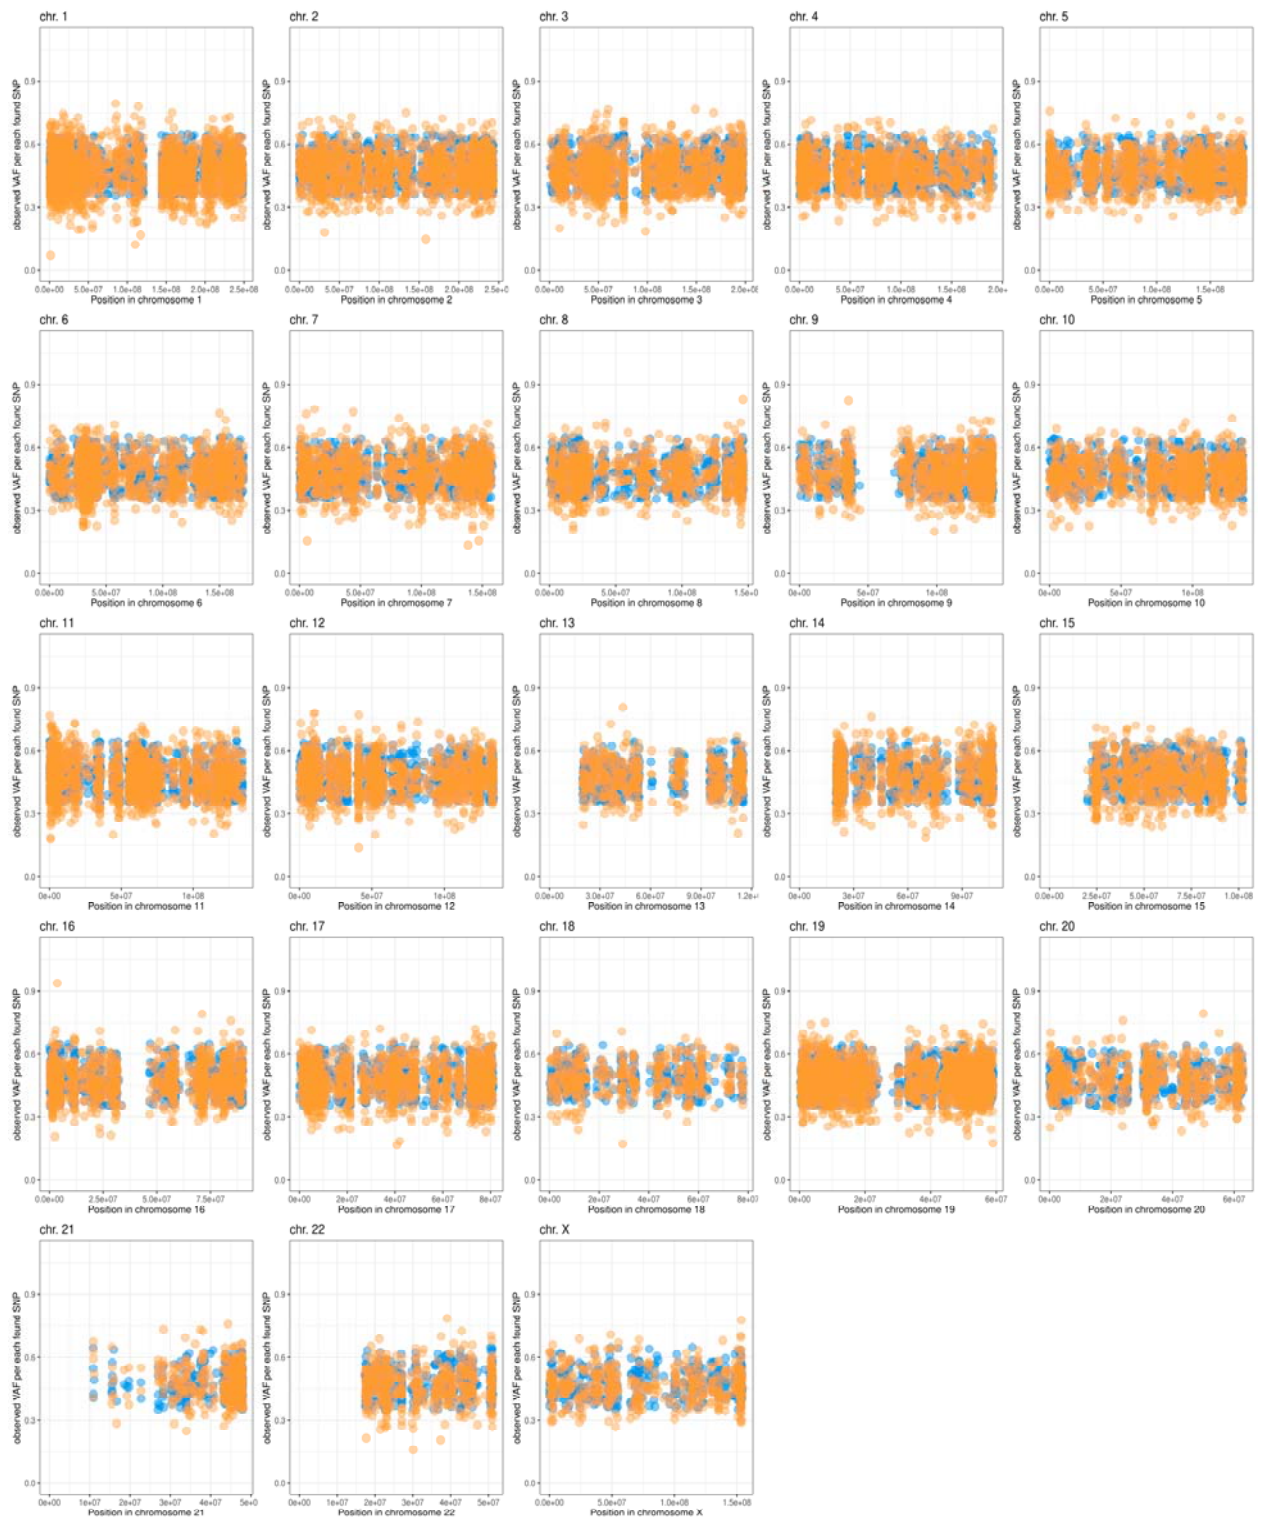

**Figure S5.** Variant allele frequency (VAF) across all chromosomes of metastasis (orange dots) and lymph node (blue dots).



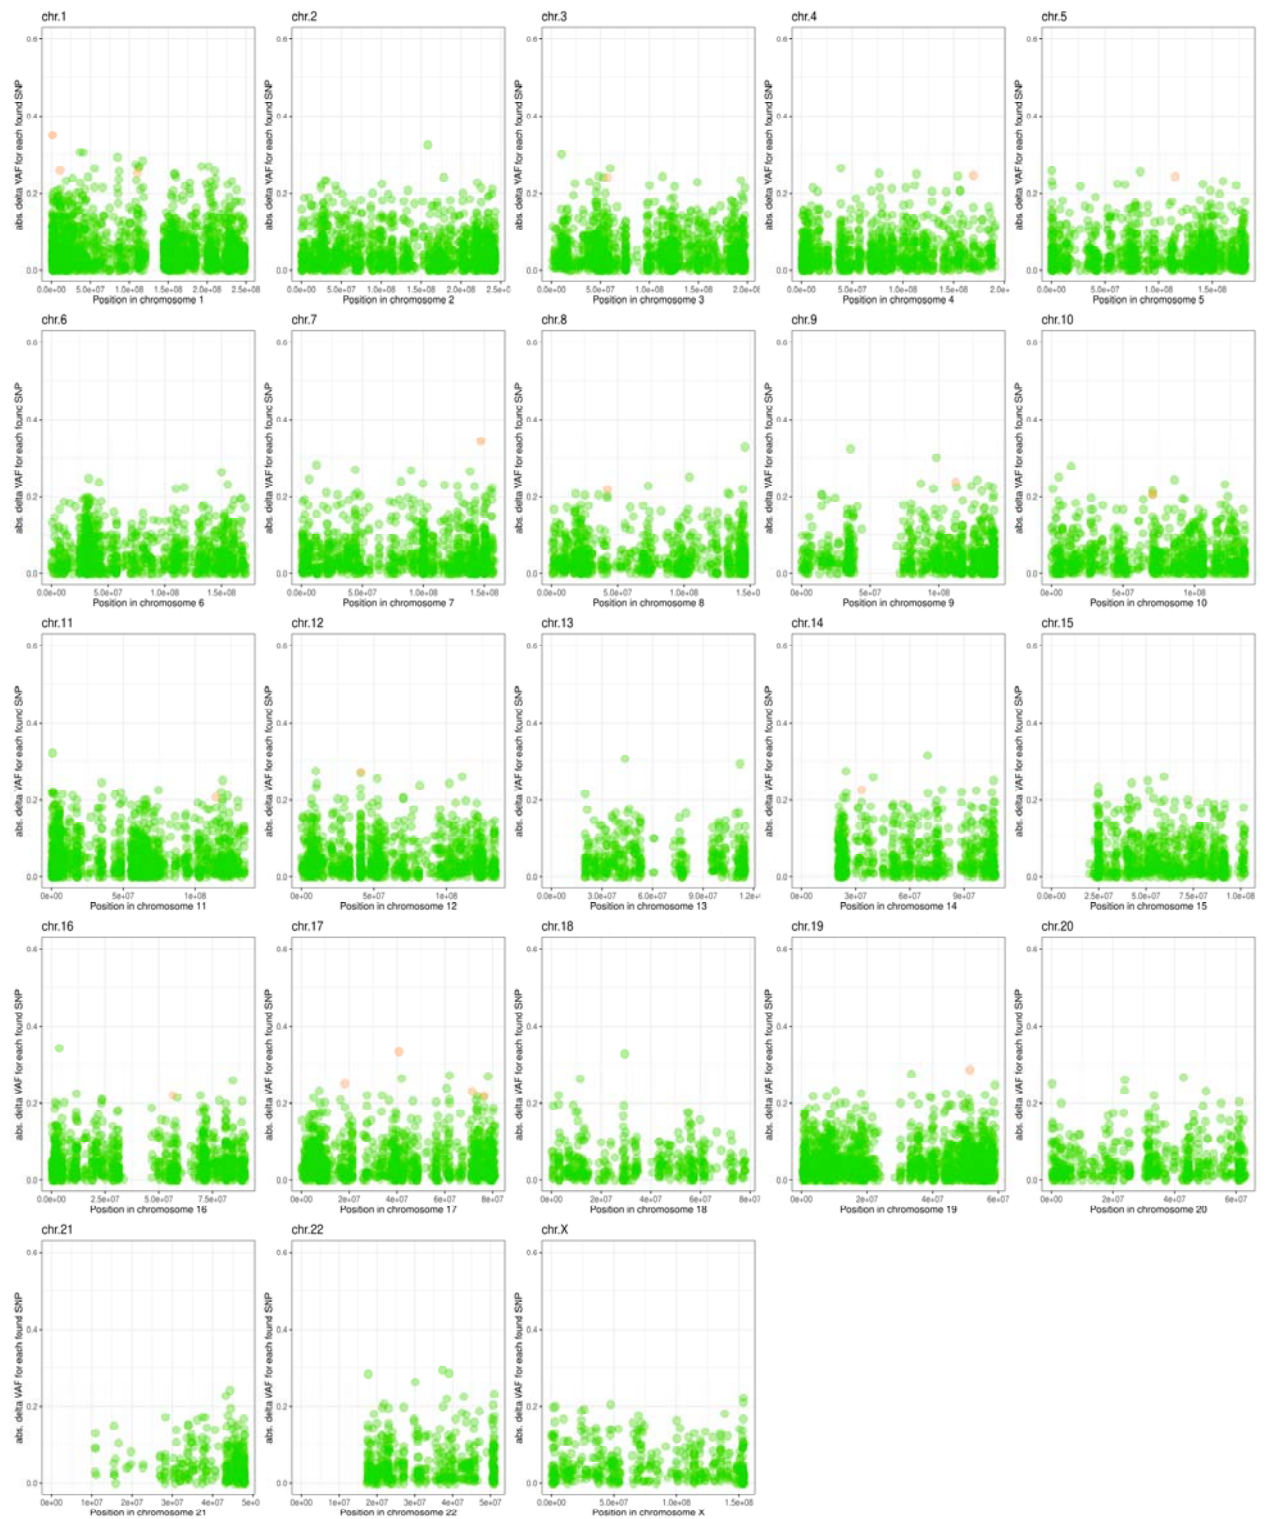

**Figure S6.** Delta-variant allele frequency (VAF) across all chromosomes. Green dots indicate VAF with a difference between metastasis and lymph node less than 0.2, orange dots marked those with more than 0.2.
